# Supplementary material
Source: PubMed Central journal article supplement (PMC4482795)
Supplement: NIHMS688532-supplement-2.pdf [file NIHMS688532-supplement-2.pdf]

## Supplementary Tables

**Supplementary Table 1.** Correlations between A $\beta$  and sleep variables

| Variable                                          | Kendall's Tau |          |
|---------------------------------------------------|---------------|----------|
|                                                   | $\tau$        | <i>P</i> |
| <b>Correlations with mPFC A<math>\beta</math></b> |               |          |
| Time in Bed (min)                                 | -0.11         | 0.458    |
| Total Sleep Time (min)                            | -0.21         | 0.133    |
| Sleep Latency (min)                               | 0.07          | 0.627    |
| Wake After Sleep Onset                            | 0.22          | 0.112    |
| Stage 1 (min)                                     | -0.03         | 0.825    |
| Stage 2 (min)                                     | -0.22         | 0.127    |
| Slow Wave Sleep (min)                             | 0.10          | 0.493    |
| Rapid Eye Movement Sleep (min)                    | -0.29         | 0.038    |
| Sleep Efficiency (%)                              | -0.23         | 0.102    |
| mPFC NREM SWA                                     | -0.02         | 0.895    |
